# Supplementary material for: Importance of Self-Efficacy in Eating Behavior and Physical Activity Change of Overweight and Non-Overweight Adolescent Girls Participating in Healthy Me: A Lifestyle Intervention with Mobile Technology
Source: PubMed Central journal article supplement (PMC7400873; doi:10.3390/nu12072128), 2020-07-17
Supplement: nutrients-12-02128-s001.pdf [file nutrients-12-02128-s001.pdf]

**Table S1.** By the type of intervention and body weight status (%).

| Intervention Group         | Full       |      |                   |                |      |                   | Partial    |      |                   |                |      |                   | Null       |      |                   |                |      |                   |
|----------------------------|------------|------|-------------------|----------------|------|-------------------|------------|------|-------------------|----------------|------|-------------------|------------|------|-------------------|----------------|------|-------------------|
| Body Weight Status         | Overweight |      |                   | Non-Overweight |      |                   | Overweight |      |                   | Non-Overweight |      |                   | Overweight |      |                   | Non-Overweight |      |                   |
| Study                      | S1         | S2   | S3                | S1             | S2   | S3                | S1         | S2   | S3                | S1             | S2   | S3                | S1         | S2   | S3                | S1             | S2   | S3                |
| Fruit consumption          |            |      |                   |                |      |                   |            |      |                   |                |      |                   |            |      |                   |                |      |                   |
| < once a week              | 8.5        | 9.2  | 4.2               | 3.8            | 4.7  | 4.9               | 6.8        | 5.1  | 3.4               | 7.4            | 7.4  | 5.3               | 5.3        | 7.0  | 8.6               | 6.4            | 5.9  | 4.5               |
| Once a week                | 5.6        | 8.5  | 7.7               | 7.6            | 9.4  | 9.3               | 8.5        | 5.1  | 6.8               | 8.4            | 9.5  | 11.1              | 10.5       | 6.6  | 13.8              | 8.4            | 7.4  | 7.4               |
| 2–6 days a week            | 50.7       | 45.8 | 50.7              | 52.7           | 51.9 | 48.2              | 52.5       | 55.9 | 50.8              | 54.7           | 55.0 | 55.0              | 47.4       | 49.6 | 43.1              | 46.0           | 51.0 | 54.0              |
| Daily                      | 35.2       | 36.6 | 37.3              | 35.9           | 34.0 | 37.6              | 32.2       | 33.9 | 39.0              | 29.5           | 28.0 | 28.6              | 36.8       | 36.8 | 34.5              | 39.1           | 35.6 | 34.2              |
| Vegetables consumption     |            |      |                   |                |      |                   |            |      |                   |                |      |                   |            |      |                   |                |      |                   |
| < once a week              | 7.8        | 6.6  | 4.9               | 6.0            | 5.4  | 6.7               | 8.6        | 5.2  | 5.2               | 6.3            | 7.4  | 4.8               | 14.0       | 1.8  | 5.2               | 8.0            | 6.9  | 7.5               |
| Once a week                | 8.5        | 5.1  | 9.9               | 10.7           | 8.7  | 8.2               | 5.2        | 12.1 | 13.8              | 10.1           | 8.5  | 7.4               | 5.3        | 12.5 | 8.6               | 7.5            | 7.4  | 6.5               |
| 2–6 days a week            | 44.7       | 52.6 | 50.7              | 46.2           | 50.4 | 51.4              | 44.8       | 56.9 | 46.6              | 52.9           | 54.0 | 60.1              | 49.1       | 44.6 | 46.6              | 46.3           | 50.0 | 52.2              |
| Daily                      | 39.0       | 35.8 | 34.5              | 37.1           | 35.4 | 33.7              | 41.4       | 25.9 | 34.5              | 30.7           | 30.2 | 27.7              | 31.6       | 41.1 | 39.7              | 38.3           | 35.6 | 33.8              |
| Sweets consumption         |            |      |                   |                |      |                   |            |      |                   |                |      |                   |            |      |                   |                |      |                   |
| Daily                      | 18.3       | 14.5 | 11.3              | 30.5           | 21.2 | 19.6              | 15.5       | 13.6 | 10.3              | 36.0           | 28.0 | 24.7              | 8.8        | 16.4 | 8.6               | 31.8           | 19.9 | 19.9              |
| 2–6 days a week            | 47.2       | 47.8 | 49.6              | 49.4           | 50.7 | 50.3              | 50.0       | 59.3 | 34.5              | 42.9           | 50.8 | 48.4              | 52.6       | 41.8 | 41.4              | 48.8           | 59.2 | 52.7              |
| Once a week                | 21.8       | 21.0 | 19.9              | 11.1           | 16.0 | 17.1              | 19.0       | 15.3 | 22.4              | 11.1           | 12.7 | 15.3              | 22.8       | 25.5 | 31.0              | 13.4           | 12.9 | 13.4              |
| < once a week              | 12.7       | 16.7 | 19.1 <sup>c</sup> | 8.9            | 12.1 | 13.0 <sup>a</sup> | 15.5       | 11.9 | 32.8 <sup>a</sup> | 10.1           | 8.5  | 11.6 <sup>c</sup> | 15.8       | 16.4 | 19.0              | 6.0            | 8.0  | 13.9 <sup>a</sup> |
| Sugared drinks consumption |            |      |                   |                |      |                   |            |      |                   |                |      |                   |            |      |                   |                |      |                   |
| Daily                      | 8.5        | 11.4 | 9.9               | 11.2           | 8.7  | 7.4               | 0.0        | 3.5  | 7.0               | 12.2           | 16.9 | 14.8              | 5.3        | 3.5  | 10.3              | 15.9           | 9.5  | 10.5              |
| 2–6 days a week            | 34.5       | 33.6 | 21.1              | 26.3           | 30.3 | 25.2              | 25.4       | 26.3 | 28.1              | 30.0           | 36.0 | 32.3              | 21.1       | 26.3 | 15.5              | 22.9           | 32.8 | 23.0              |
| Once a week                | 14.1       | 16.4 | 14.8              | 15.8           | 15.5 | 18.1              | 23.7       | 15.8 | 17.5              | 17.6           | 12.7 | 20.1              | 19.3       | 15.8 | 22.4              | 15.4           | 10.0 | 22.0              |
| < once a week              | 43.0       | 38.6 | 54.2 <sup>b</sup> | 46.7           | 45.5 | 49.3 <sup>c</sup> | 50.8       | 54.4 | 47.4 <sup>b</sup> | 39.9           | 34.4 | 32.8 <sup>b</sup> | 54.4       | 54.4 | 51.7              | 45.8           | 47.8 | 44.5              |
| Breakfast weekdays         |            |      |                   |                |      |                   |            |      |                   |                |      |                   |            |      |                   |                |      |                   |
| Never                      | 21.1       | 23.2 | 20.4              | 19.3           | 20.9 | 17.7              | 16.9       | 20.3 | 11.9              | 25.9           | 33.2 | 31.7              | 27.6       | 26.3 | 25.9              | 20.4           | 23.8 | 18.3              |
| 1–2 days                   | 8.5        | 16.2 | 10.6              | 9.3            | 11.1 | 12.6              | 10.2       | 11.9 | 13.6              | 15.3           | 16.8 | 12.2              | 15.5       | 8.8  | 6.9               | 11.9           | 13.4 | 13.4              |
| 3–4 days                   | 17.6       | 10.6 | 16.2              | 16.7           | 18.0 | 19.3              | 16.9       | 18.6 | 16.9              | 11.1           | 13.2 | 10.6              | 12.1       | 12.3 | 17.2              | 14.4           | 12.4 | 18.3              |
| Daily                      | 52.8       | 50.0 | 52.8 <sup>a</sup> | 54.7           | 50.0 | 50.3 <sup>a</sup> | 55.9       | 49.2 | 57.6 <sup>b</sup> | 47.6           | 36.8 | 45.5 <sup>a</sup> | 44.8       | 52.6 | 50.0 <sup>a</sup> | 53.2           | 50.5 | 50.0 <sup>a</sup> |
| Breakfast weekends         |            |      |                   |                |      |                   |            |      |                   |                |      |                   |            |      |                   |                |      |                   |
| Never                      | 5.6        | 5.0  | 7.8               | 2.4            | 5.1  | 4.3               | 1.8        | 3.4  | 3.4               | 2.4            | 4.8  | 6.3               | 1.8        | 5.3  | 3.4               | 5.0            | 5.0  | 5.0               |
| 1 day                      | 14.8       | 17.9 | 16.3              | 8.4            | 11.9 | 13.2              | 17.5       | 22.4 | 20.3              | 8.4            | 15.9 | 22.1              | 10.5       | 10.5 | 8.6               | 11.0           | 13.5 | 19.4              |
| Both days                  | 79.6       | 77.1 | 75.9              | 89.1           | 83.0 | 82.5 <sup>a</sup> | 80.7       | 74.1 | 76.3              | 89.1           | 79.4 | 71.6 <sup>a</sup> | 87.7       | 84.2 | 87.9              | 84.0           | 81.5 | 75.6              |
| MVPA <sup>1</sup>          |            |      |                   |                |      |                   |            |      |                   |                |      |                   |            |      |                   |                |      |                   |

|          |      |      |                  |      |      |                  |      |      |                   |      |      |                  |      |      |                  |      |      |                  |
|----------|------|------|------------------|------|------|------------------|------|------|-------------------|------|------|------------------|------|------|------------------|------|------|------------------|
| never    | 6.6  | 4.9  | 6.4              | 4.2  | 4.0  | 6.7              | 5.1  | 3.4  | 10.2              | 5.8  | 8.4  | 8.5              | 1.7  | 0.0  | 3.4              | 2.0  | 3.0  | 4.5              |
| 1–3 days | 36.0 | 38.7 | 41.4             | 31.1 | 39.5 | 42.3             | 54.2 | 46.6 | 44.1              | 39.7 | 41.1 | 51.3             | 46.6 | 47.4 | 51.7             | 36.1 | 35.3 | 36.6             |
| 4–6 days | 44.1 | 41.5 | 45.0             | 49.1 | 41.2 | 41.4             | 35.6 | 39.7 | 35.6              | 43.9 | 41.1 | 33.3             | 46.6 | 47.4 | 41.4             | 47.0 | 48.3 | 52.0             |
| 7 days   | 13.2 | 14.8 | 7.1 <sup>a</sup> | 15.6 | 15.3 | 9.6 <sup>a</sup> | 5.1  | 10.3 | 10.2 <sup>a</sup> | 10.6 | 9.5  | 6.9 <sup>a</sup> | 5.2  | 5.3  | 3.4 <sup>a</sup> | 14.9 | 13.4 | 6.9 <sup>a</sup> |

Differences between 3 study periods by the Kendall's W test: <sup>a</sup>  $p < 0.001$ ; <sup>b</sup>  $p < 0.01$ ; <sup>c</sup>  $p < 0.05$ . <sup>1</sup>MVPA: moderate-to-vigorous physical activity.

**Table S2.** Health Behavior Index (HBI) change in 3 study periods by the type of intervention.

|                       | Type of Intervention |              |              | <i>p</i> <sup>2</sup> |
|-----------------------|----------------------|--------------|--------------|-----------------------|
|                       | Full                 | Partial      | Null         |                       |
|                       | M ± SD               | M ± SD       | M ± SD       |                       |
| Study 1               | 13.89 ± 3.17         | 13.24 ± 3.34 | 13.64 ± 3.21 | 0.033                 |
| Study 2               | 14.91 ± 4.07         | 13.88 ± 4.00 | 15.16 ± 4.19 | <0.001                |
| Study 3               | 13.93 ± 3.26         | 13.08 ± 3.42 | 13.83 ± 3.22 | 0.008                 |
| <i>p</i> <sup>1</sup> | <0.001               | 0.001        | <0.001       |                       |

<sup>1</sup> Differences in HBI between 3 study rounds—Kendall's W test for repeated measures. <sup>2</sup> Differences by type of intervention—H<sup>2</sup> Kruskal–Wallis test for independent groups.

**Table S3.** Changes in the self-efficacy before and after the Healthy Me program by the type of intervention.

|                             | Type of Intervention |              |              | <i>p</i> <sup>2</sup> |
|-----------------------------|----------------------|--------------|--------------|-----------------------|
|                             | Full                 | Partial      | Null         |                       |
| General Self-Efficacy (GSE) |                      |              |              |                       |
| Study 1                     | 35.04 ± 5.51         | 34.73 ± 5.04 | 33.83 ± 5.10 | 0.009                 |
| Study 3                     | 34.56 ± 5.17         | 33.93 ± 5.43 | 34.15 ± 4.90 | 0.392                 |
| <i>p</i> <sup>1</sup>       | 0.030                | 0.027        | 0.354        |                       |
| Domain of strength          |                      |              |              |                       |
| Study 1                     | 17.57 ± 3.11         | 17.46 ± 3.20 | 16.86 ± 3.23 | 0.009                 |
| Study 3                     | 17.29 ± 3.13         | 17.07 ± 3.39 | 16.89 ± 3.28 | 0.342                 |
| <i>p</i> <sup>1</sup>       | 0.020                | 0.138        | 0.832        |                       |
| Domain of perseverance      |                      |              |              |                       |
| Study 1                     | 17.40 ± 3.44         | 17.31 ± 3.07 | 16.99 ± 3.32 | 0.305                 |
| Study 3                     | 17.26 ± 3.15         | 16.85 ± 3.17 | 17.22 ± 3.10 | 0.379                 |
| <i>p</i> <sup>1</sup>       | 0.262                | 0.060        | 0.354        |                       |

<sup>1</sup> Differences in self-efficacy between 1st and 3rd study rounds—Kendall's W test for repeated measures.

<sup>2</sup> Differences by type of intervention—H<sup>2</sup> Kruskal–Wallis test for independent groups.
